# Supplementary material for: One-step conversion from metal–organic frameworks to Co3O4@N-doped carbon nanocomposites towards highly efficient oxygen reduction catalysts
Source: Royal Society of Chemistry journal article supplement (doi:10.1039/c4ta00677a), 2014-01-01
Supplement: c4ta00677a1.pdf [file c4ta00677a1.pdf]

# One-step conversion from metal-organic framework to $\text{Co}_3\text{O}_4@\text{N}$ -doped carbon nanocomposites towards high efficient oxygen reduction catalyst

(Supplementary Information)

## Materials and General Methods

All materials were reagent grade obtained from commercial sources and used without further purification. The particle size and shape were analysed with TEM using a Philips/FEI Tecnai 12 BioTWIN TEM operating at 200 kV. The TEM samples were prepared by dropping the sample solution onto a copper grid covered with carbon and dried in air. The XPS spectra were obtained by using a KRATOS Axis ultra-DLD X-ray photoelectron spectrometer with a monochromatised Mg  $K\alpha$  X-ray ( $h\nu = 1283.3$  eV). XPS samples were prepared by drying a dispersion of different products on a piece of Cu wafer. Powder X-ray diffraction (PXRD) data were collected on an X'Pert-ProMPD (Holand) D/max- $\gamma$ A X-ray diffractometer with Cu  $K\alpha$  radiation in a flat plate geometry.

### Synthesis of Co-I-MOF

A mixture of  $\text{Co}(\text{OAC})_2 \cdot 4\text{H}_2\text{O}$  (0.6 mmol), Hypoxanthine (0.6 mmol), NaOH aqueous solution (0.6 mL, 1 M) and distilled water (10 mL) was placed in an 18 mL Teflon-lined stainless steel vessel and stirred about 15 min in air. The vessel was sealed and heated at 130 °C for 4 d under autogenous pressure, and then cooled to room temperature naturally, purple block crystals were obtained.

### Synthesis of $\text{Co}_3\text{O}_4@\text{N}$ -C nanocomposites

The obtained Co-I-MOF were calcined in nitrogen at 800 °C for 12 h, and  $\text{Co}_3\text{O}_4@\text{N}$ -C doped carbon nanocomposites were prepared.

### Sample preparation for TEM and XRD

TEM samples were prepared by drop-drying the samples from their diluted aqueous suspensions onto copper grids. XRD samples were prepared by drop-drying the samples from their aqueous suspensions onto glass substrates.

### Electrochemical Measurements

Electrochemical measurements were performed at room temperature using a rotating disk working electrode made of glassy carbon (3 mm in diameter). The catalyst ink was fabricated as follows: 4 mg of powder was dispersed in 1 ml absolute ethanol by sonicating. 15 ml catalyst ink was dropped on the glassy carbon disk electrode and dried naturally. Finally, 10 ml Nafion (0.05 wt%) solution was pipetted onto the catalyst film, and dried at room temperature.

All the electrochemical measurements were performed using a CHI660C electrochemical workstation at a scanning rate of 10  $\text{mV s}^{-1}$  at room temperature in a standard three-electrode cell at room temperature, in which a Pt wire was used as the counter electrode, a saturated calomel electrode (SCE) was used as the reference, and the modified glass carbon rotating disk electrode was used as the working electrode. Electrolyte was saturated with oxygen by bubbling  $\text{O}_2$  prior to the start of each experiment. A flow of  $\text{O}_2$  was maintained over the electrolyte during the recording of CVs in order to ensure its continued  $\text{O}_2$  saturation. The working electrode was cycled at least 5 times before data were recorded at a scan rate of  $5\text{mVs}^{-1}$ . In control

experiments, CV measurements were also performed in  $N_2$  by switching to  $N_2$  flow through the electrochemical cell. The electrochemical measurements for ORR were performed in  $O_2$ -saturated 0.1 M KOH solution. The polarization curves were obtained by sweeping the potential from -1.0 to -0.2 V (vs. SCE) at the scan rate of  $10 \text{ mV s}^{-1}$  under different rotation rates.

#### $N_2$ adsorption–desorption measurement

To further confirm the confinement characteristics of the present  $Co_3O_4@N-C$  core–shell nanostructures,  $N_2$  adsorption–desorption measurement was carried out. The  $N_2$  adsorption–desorption isotherm for  $Co_3O_4@N-C$  core–shell nanostructures (Fig. S2) exhibits a type-IV isotherm, indicating a typical physisorption process of a mesoporous material. That is to say, the obtained  $Co_3O_4@N-C$  core–shell nanostructures provide an ideal model for the nanocatalyst with the effect of synergetic confinement. A suitable optimization of the structures and composition can further enhance their catalytic property.

#### Supporting Figures

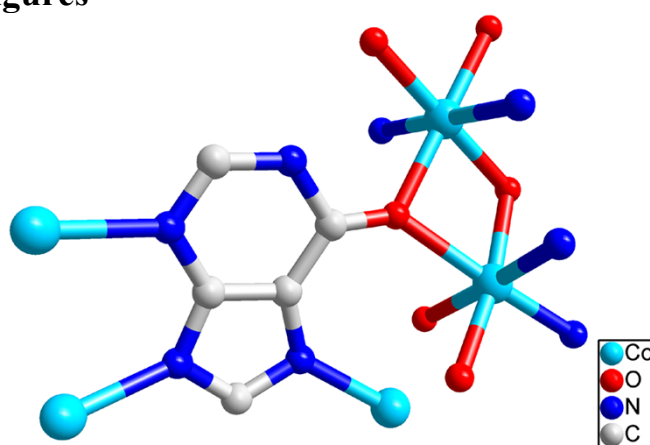

**Fig. S1** Ball-stick view of the asymmetric unit of Co-I-MOF. For clarity, the hydrogen atoms and lattice water molecules are omitted.

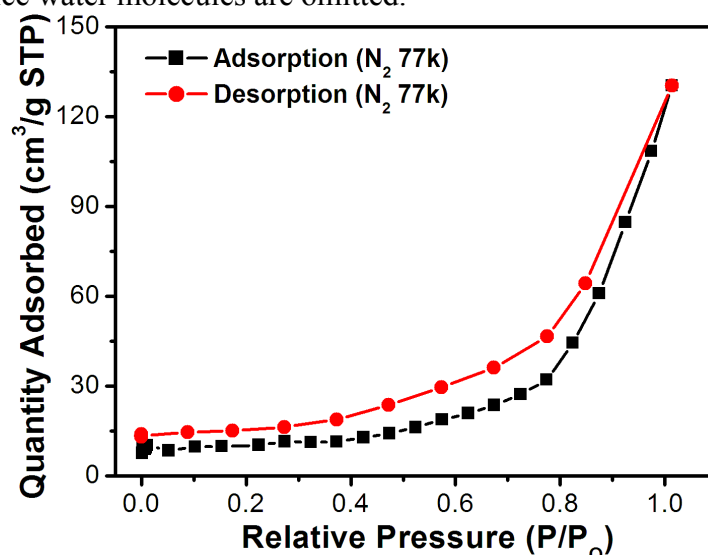

**Fig.S2** Nitrogen adsorption–desorption isotherms of  $Co_3O_4@N-C$  at 77 K.

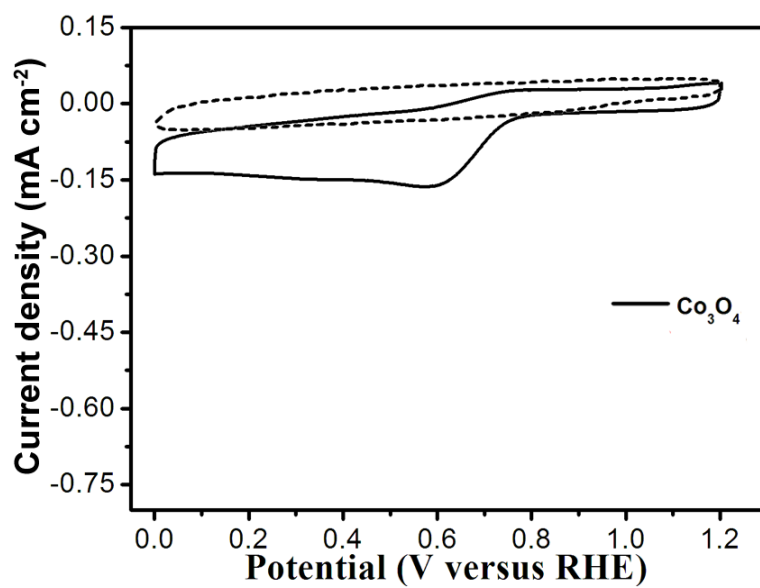

**Fig.S3** (a) Cyclicvoltammograms of ORR on Co<sub>3</sub>O<sub>4</sub> catalyst in O<sub>2</sub>-saturated (solid line) or N<sub>2</sub>-saturated 0.1M KOH (dash line) (scan rate: 50 mVs<sup>-1</sup>).
